# Supplementary material for: Future inhibition of ecosystem productivity by increasing wildfire pollution over boreal North America
Source: Copernicus journal article supplement (doi:10.5194/acp-17-13699-2017), 2017-11-17
Supplement: Supplementary file 1 [file acp-17-13699-2017-supplement.pdf]

Supplement of Atmos. Chem. Phys., 17, 13699–13719, 2017  
<https://doi.org/10.5194/acp-17-13699-2017-supplement>  
© Author(s) 2017. This work is distributed under  
the Creative Commons Attribution 3.0 License.

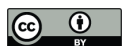

*Supplement of*

## **Future inhibition of ecosystem productivity by increasing wildfire pollution over boreal North America**

**X. Yue et al.**

*Correspondence to:* Xu Yue (xuyueseas@gmail.com)

The copyright of individual parts of the supplement might differ from the CC BY 3.0 License.

(a) JJA soil moisture from ModelE2-YIBs

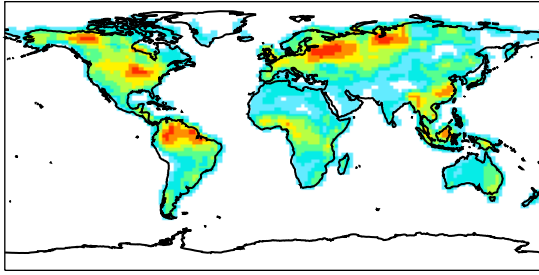

(b) DJF soil moisture from ModelE2-YIBs

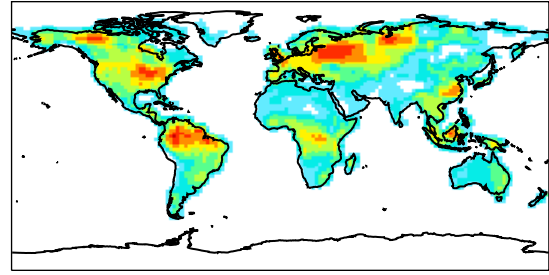

(c) JJA soil moisture from CLM

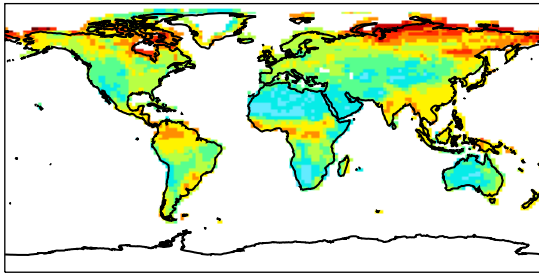

(d) DJF soil moisture from CLM

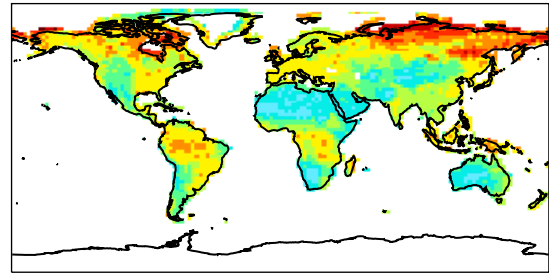

(e) JJA soil moisture from ERA-Interim

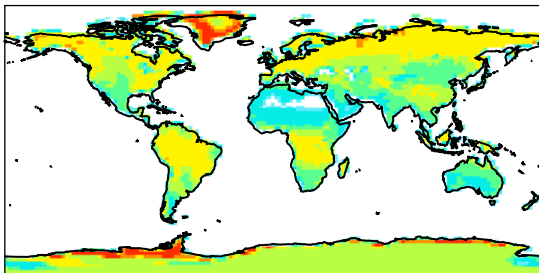

(f) DJF soil moisture from ERA-Interim

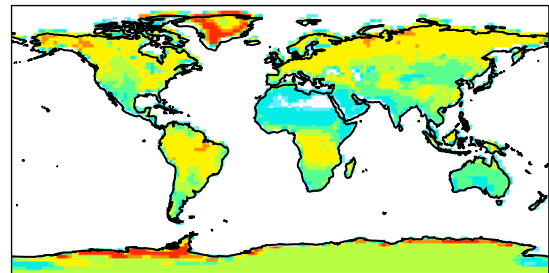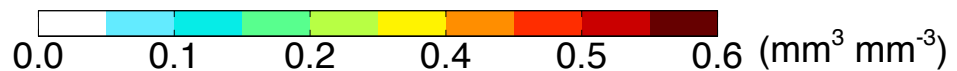

**Figure S1.** Comparison of (a, c, e) summer (June-August) and (b, d, f) winter (December-February) soil moisture at the top 1 m from (a, b) ModelE2-YIBs simulation, (c, d) CLM simulation, and (e, f) ERA-Interim reanalyses. The CLM simulation is performed using the Community Land Model driven with meteorological forcing from ERA-Interim reanalyses for 1980-2009 (Wang et al., 2016). The ERA-Interim reanalyses are downloaded from <https://www.ecmwf.int>. For >3300 land grids in the summer, the spatial correlation coefficient is  $R = 0.25$  between ModelE2-YIBs and CLM, and  $R = 0.34$  between CLM and ERA-Interim. The global area-weighted soil moisture is  $0.22 \text{ mm}^3 \text{ mm}^{-3}$  for ModelE2-YIBs,  $0.26 \text{ mm}^3 \text{ mm}^{-3}$  for CLM, and  $0.23 \text{ mm}^3 \text{ mm}^{-3}$  for ERA-Interim. Statistics for winter are very similar to the summer results.

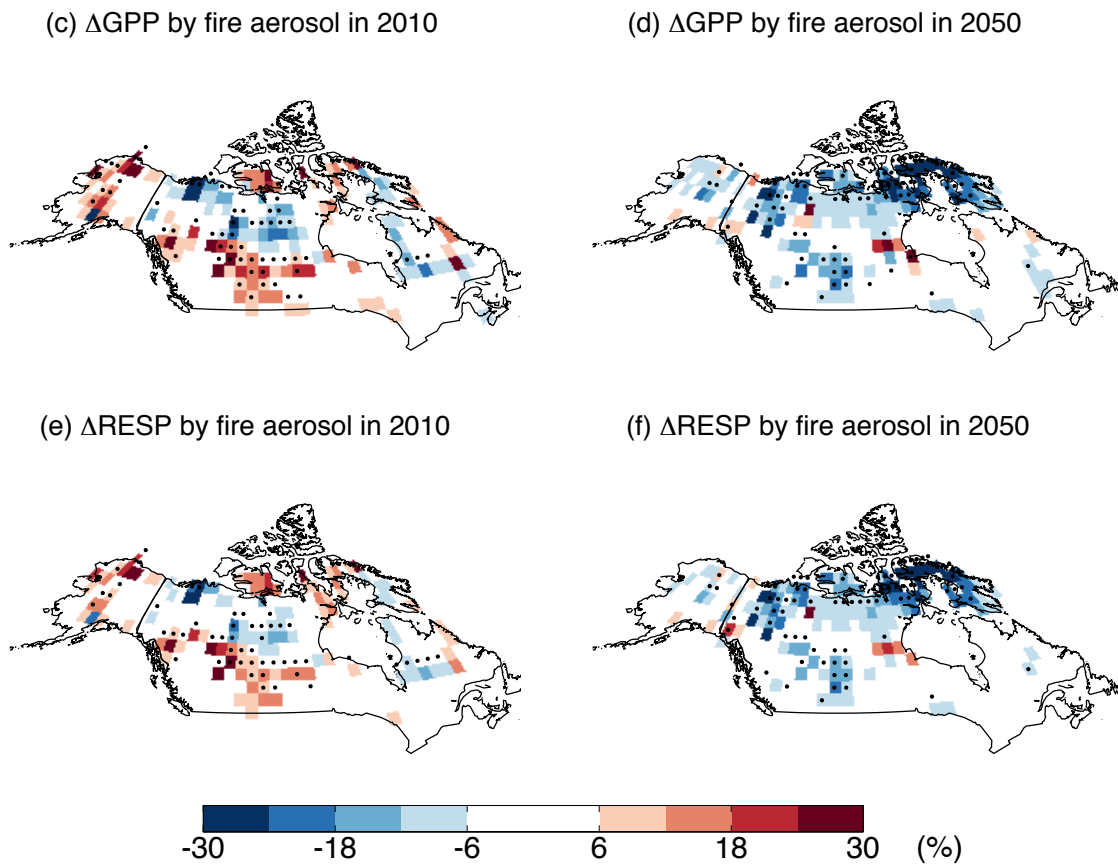

**Figure S2.** Predicted percentage changes in summer (a, b) GPP, and (c, d) autotrophic respiration caused by wildfire aerosols at (a, c) present day and (b, d) midcentury. Results for the 2010s are calculated as  $(F10AERO/F10CTRL - 1) \times 100\%$ . Results for the 2050s are calculated as  $(F50AERO/F50CTRL - 1) \times 100\%$ . Significant changes ( $p < 0.05$ ) are marked with black dots.

**Reference**

Wang, A. H., Zeng, X. B., and Guo, D. L.: Estimates of Global Surface Hydrology and Heat Fluxes from the Community Land Model (CLM4.5) with Four Atmospheric Forcing Datasets, *Journal of Hydrometeorology*, 17, 2493-2510, doi:10.1175/Jhm-D-16-0041.1, 2016.
